# Supplementary material
Source: HighWire-hosted journal article supplement (https://bmjpaedsopen.bmj.com/content/5/1/e001200)
Supplement: inline-supplementary-material-1 [file inline-supplementary-material-1.pdf]

**Figure 1. Search strategy****Database: OVID Medline Epub Ahead of Print, In-Process & Other Non-Indexed Citations, OVID MEDLINE(R) Daily and Ovid MEDLINE(R) 1946 to Present****Date: May 27, 2021****Results = 903**

1. exp Infant, Newborn/
2. NEONATOLOGY/
3. Intensive Care Units, Neonatal/
4. NICU.mp.
5. Infant\*.mp
6. Neonat\*.mp
7. ((premature\* or pre-term or preterm or postmature or post-mature or term) adj3 birth\*).mp
8. Baby.mp
9. Babies.mp
10. Preemie\*.mp
11. Premie.mp.
12. Newborn.mp.
13. Or/1-12
14. exp Hypotension/
15. exp Blood Pressure/
16. Hypotension.mp.
17. ((blood or systolic or pulse) adj2 pressure).mp.
18. Or/14-17
19. Hydrocortisone/
20. Hydrocortisone.mp
21. Glucocorticoid\*.mp
22. Corticosteroid\*.mp
23. Steroid\*.mp
24. Or/19-23
25. 13 and 18 and 24
